# Supplementary material for: Vertical profile of particle hygroscopicity and CCN effectiveness during winter in Beijing: insight into the hygroscopicity transition threshold of black carbon
Source: Royal Society of Chemistry journal article supplement (doi:10.1039/d0fd00077a), 2020-10-08
Supplement: d0fd00077a1.pdf [file d0fd00077a1.pdf]

## Supplementary materials

For

### **Vertical profile of particle hygroscopicity and CCN effectiveness during winter in Beijing: insight into the hygroscopicity transition threshold of black carbon**

Dawei Hu<sup>1</sup>, Yu Wang<sup>1</sup>, Chenjie Yu<sup>1</sup>, Qiaorong Xie<sup>2</sup>, Siyao Yue<sup>2</sup>, Dongjie Shang<sup>3</sup>, Xin Fang<sup>3</sup>, Rutambhara Joshi<sup>1</sup>, Dantong Liu<sup>1,§</sup>, James Allan<sup>1,4</sup>, Zhijun Wu<sup>3</sup>, Min Hu<sup>3</sup>, Pingqing Fu<sup>2</sup>, Gordon McFiggans<sup>1,\*</sup>

<sup>1</sup>School of Earth and Environmental Sciences, University of Manchester, UK.

<sup>2</sup>State Key Laboratory of Atmospheric Boundary Layer Physics and Atmospheric Chemistry, Institute of Atmospheric Physics, Chinese Academy of Sciences, Beijing 100029, China.

<sup>3</sup>State Key Joint Laboratory of Environmental Simulation and Pollution Control, International Joint Laboratory for Regional Pollution Control, Ministry of Education (IJRC), College of Environmental Sciences and Engineering, Beijing, 100871, China.

<sup>4</sup>National Centre for Atmospheric Science, University of Manchester, Manchester, UK.

<sup>§</sup>Now at: Department of Atmospheric Sciences, School of Earth Sciences, Zhejiang University, Hangzhou, Zhejiang, China.

Correspondence to: Gordon McFiggans ([g.mcfiggans@manchester.ac.uk](mailto:g.mcfiggans@manchester.ac.uk))

**Table S1 Density and kappa of compounds used in the calculation of  $\kappa_{\text{chem}}$** 

|                                                 | Density (kg/m <sup>3</sup> ) | Kappa                                               |
|-------------------------------------------------|------------------------------|-----------------------------------------------------|
| NH <sub>4</sub> NO <sub>3</sub>                 | 1720                         | 0.67 <sup>a</sup>                                   |
| (NH <sub>4</sub> ) <sub>2</sub> SO <sub>4</sub> | 1769                         | 0.61(CCN) <sup>a</sup><br>0.53 (HTDMA) <sup>a</sup> |
| Organics                                        | 1200 <sup>b</sup>            | 0.1 <sup>c</sup>                                    |
| Black Carbon                                    | 1800                         | 0                                                   |

<sup>a</sup> The kappa values are from *Petters and Kreidenweis*<sup>1</sup>.

<sup>b</sup> The density of organics is from *Turpin and Lim*<sup>2</sup>.

<sup>c</sup> The kappa value of organics is from *Wex et al.*<sup>3</sup>.

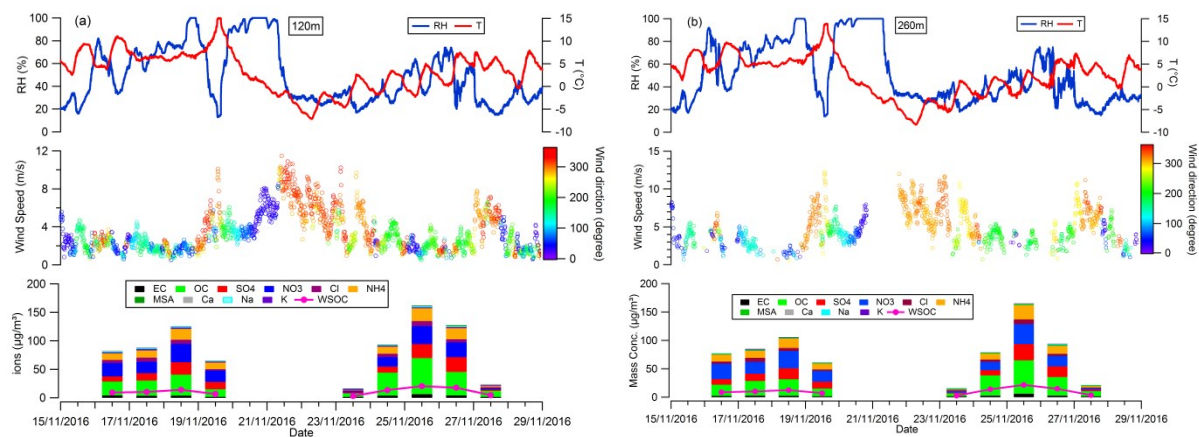

**Fig. S1** Temporal evolution of RH, T, wind speed and direction, mass concentration of compositions at (a) 120 m and (b) 260 m during the experiment.

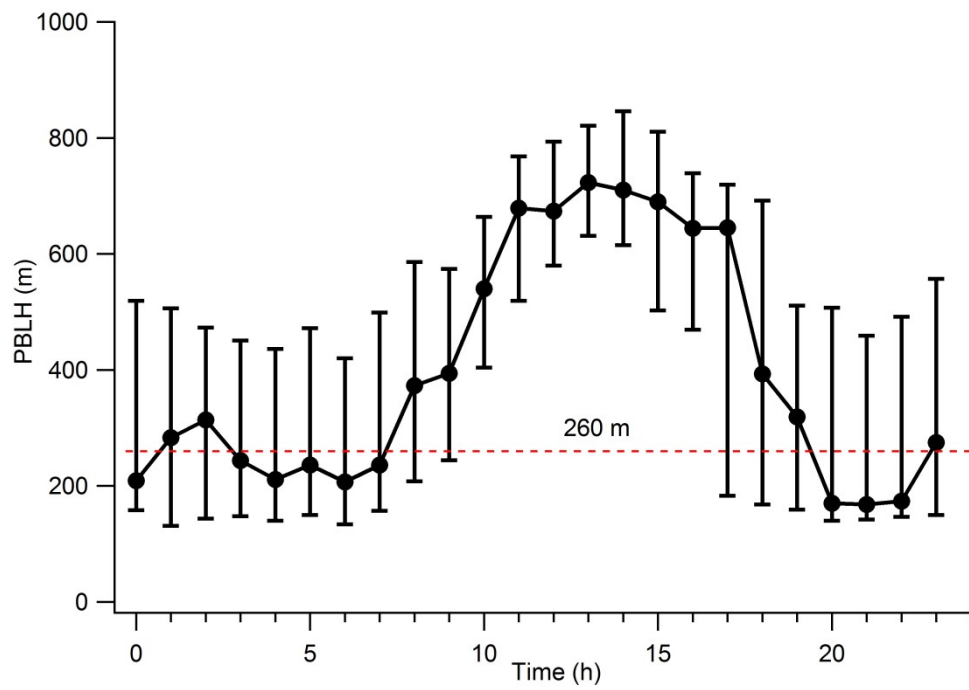

**Fig. S2** Diurnal variation of planetary boundary layer height (PBLH) during the measurement.

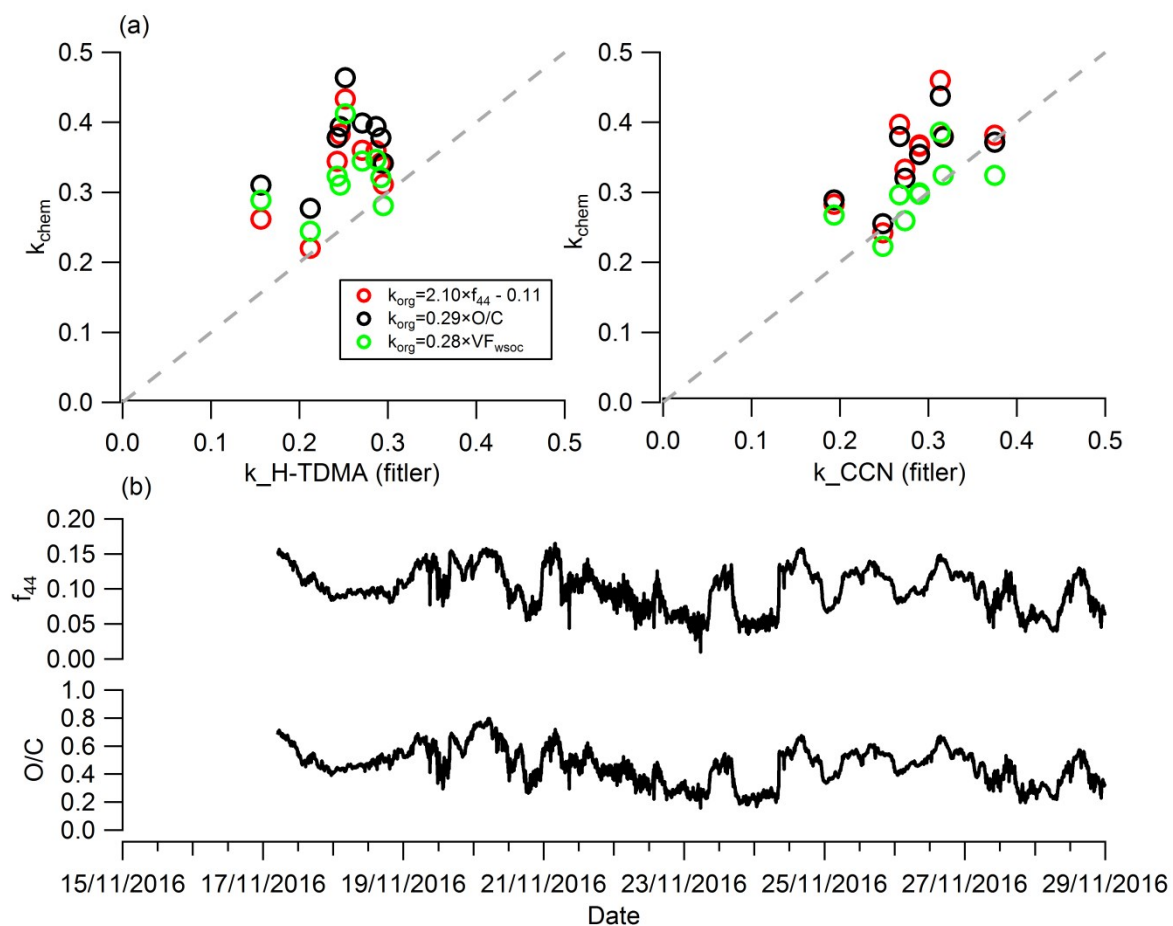

**Fig. S3** (a) Correlation of  $\kappa_{\text{chem}}$  with the kappa from H-TDMA and CCN measurement of filter samples at 8m; (b) Temporal evolution of O/C and  $f_{44}$  of PM1.0 measured by AMS at the ground site during the experiment.

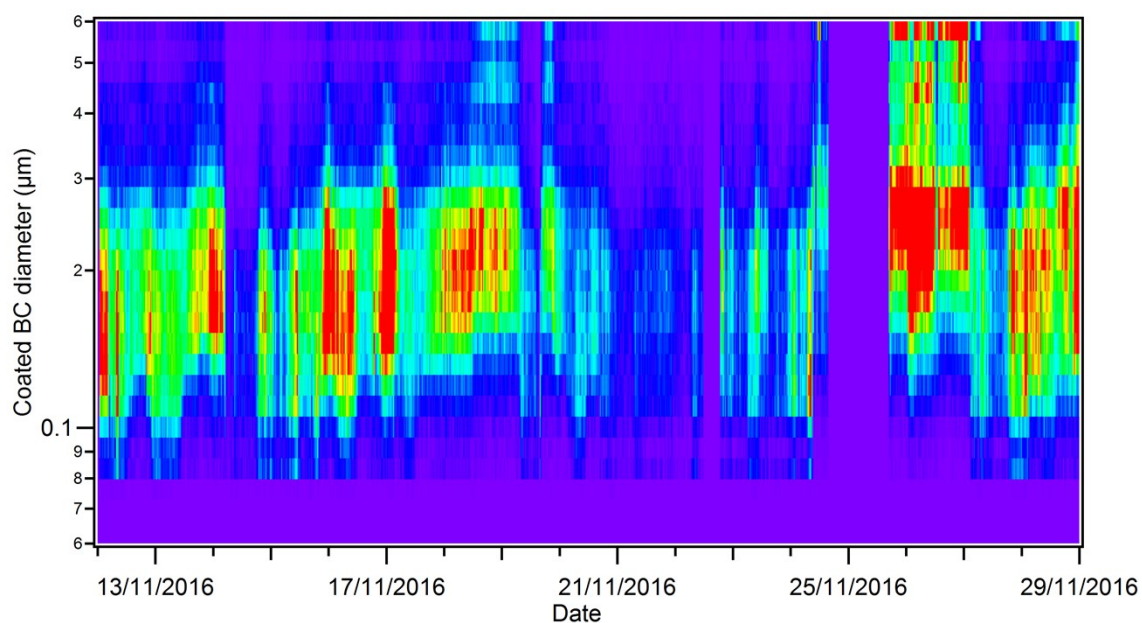

**Fig. S4** Size distribution of coated BC particles during the measurement.

## Reference

1. M. D. Petters and S. M. Kreidenweis, *Atmos. Chem. Phys.*, 2007, **7**, 1961-1971.
2. B. J. Turpin and H.-J. Lim, *Aerosol Science and Technology*, 2001, **35**, 602-610.
3. H. Wex, G. McFiggans, S. Henning and F. Stratmann, *Geophys. Res. Lett.*, 2010, **37**.
